# Supplementary material
Source: PubMed Central journal article supplement (PMC6081240)
Supplement: NIHMS958297-supplement-1.pdf [file NIHMS958297-supplement-1.pdf]

## Supplementary Figure S2

**a- $\alpha$ v $\beta$ 6 mAb**  
**Isotype Control mIgG**

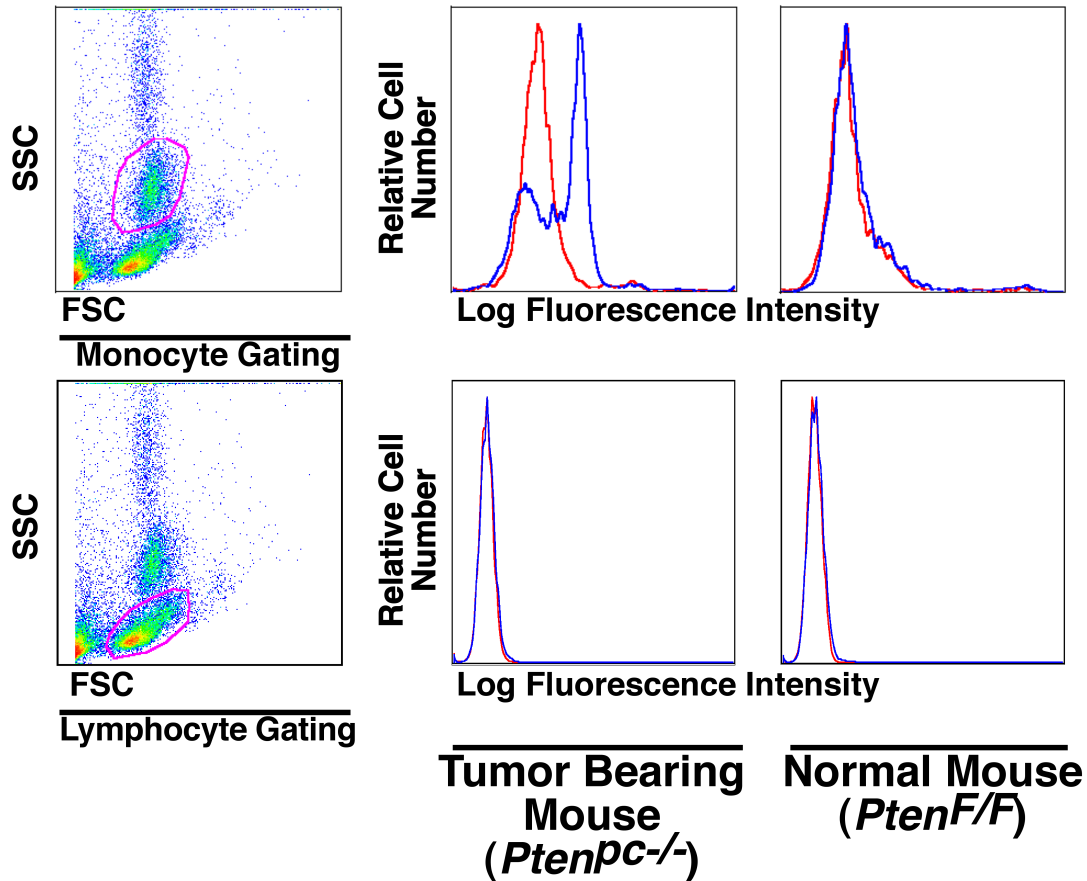

**Supplementary Fig S2.  $\alpha$ v $\beta$ 6 is detected in PBMC from *Pten<sup>pc-/-</sup>* mice.** Left, SSC and FSC were used for gating of monocytes and lymphocytes from *Pten<sup>pc-/-</sup>* and normal mice (*Pten<sup>F/F</sup>*) derived PBMC isolated by Lympholyte separation gradient. Right, FACS analysis of cell surface expression of  $\alpha$ v $\beta$ 6 in monocytes and lymphocytes from *Pten<sup>pc-/-</sup>* and *Pten<sup>F/F</sup>*, utilizing 6.3G9 monoclonal antibody to  $\alpha$ v $\beta$ 6 and mouse IgG as isotype control. Data from a representative tumor-bearing mouse, and a normal mouse are shown.

## Supplementary Figure S1

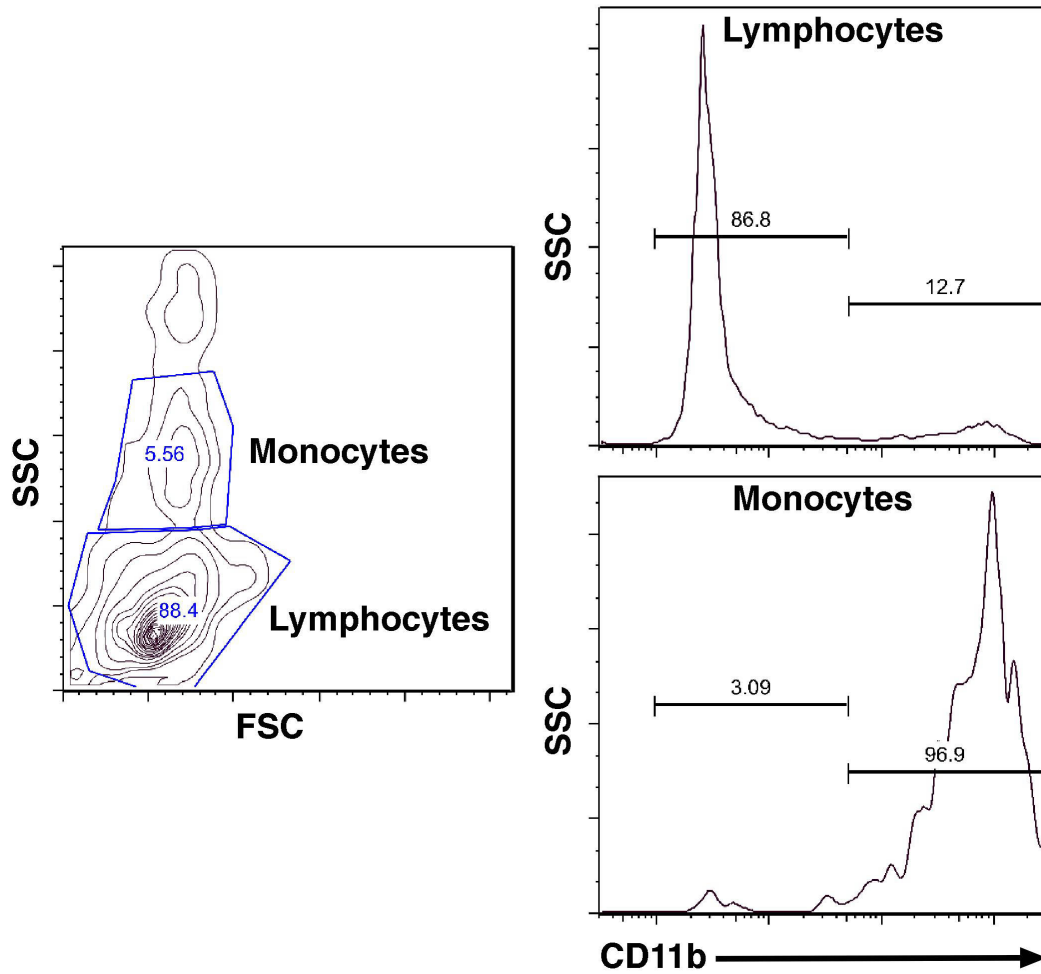

**Supplementary Fig S1. CD11b staining of  $\beta 6^{-/-}$  PBMC.** Left, Monocytes and lymphocytes are gated by FSC and SSC. Right, FACS analysis of CD11b expression in monocytes and lymphocytes.

# Supplementary File

## Exosomal $\alpha_v\beta_6$ integrin is required for monocyte M2 polarization in prostate cancer

Huimin Lu<sup>a, b</sup>, Nicholas Bowler<sup>b</sup>, Larry A. Harshyne<sup>c</sup>, D. Craig Hooper<sup>b, c</sup>, Shiv Ram Krishn<sup>a, b</sup>, Senem Kurtoglu<sup>a, b</sup>, Carmine Fedele<sup>a, b, 1</sup>, Qin Liu<sup>a, d</sup>, Hsin-Yao Tang<sup>e</sup>, Andrew V. Kossenkov<sup>e</sup>, William K. Kelly<sup>f</sup>, Kerith Wang<sup>f</sup>, Rhonda B. Kean<sup>b, c</sup>, Paul H. Weinreb<sup>g</sup>, Lei Yu<sup>h</sup>, Anindita Dutta<sup>a, b, 2</sup>, Paolo Fortina<sup>b, i</sup>, Adam Ertel<sup>b, i</sup>, Maria Stanczak<sup>j</sup>, Flemming Forsberg<sup>j</sup>, Dmitry I. Gabrilovich<sup>a, k</sup>, David W. Speicher<sup>d, e</sup>, Dario C. Altieri<sup>a, k</sup> and Lucia R. Languino<sup>a, b</sup>

a - Prostate Cancer Discovery and Development Program, Thomas Jefferson University, Philadelphia, Pennsylvania, USA

b - Department of Cancer Biology, Sidney Kimmel Cancer Center, Thomas Jefferson University, Philadelphia, Pennsylvania, USA

c - Department of Neurological Surgery, Thomas Jefferson University, Philadelphia, Pennsylvania, USA

d - Molecular and Cellular Oncogenesis Program, Wistar Institute, Philadelphia, PA, USA

e - Center for Systems and Computational Biology, Wistar Institute, Philadelphia, PA, USA

f - Departments of Medical Oncology, Sidney Kimmel Cancer Center, Thomas Jefferson University, Philadelphia, PA, USA

g - Biogen Idec Inc., Cambridge, MA, USA

h - Flow Cytometry Core Facility, Sidney Kimmel Cancer Center, Thomas Jefferson University, Philadelphia, PA, USA

i - Cancer Genomics and Bioinformatics Laboratory, Sidney Kimmel Cancer Center, Thomas Jefferson University, Philadelphia, PA, USA

j - Department of Radiology, Thomas Jefferson University, Philadelphia, PA, USA

k - Immunology, Microenvironment and Metastasis Program, Wistar Institute, Philadelphia, PA, USA.

1 - Current address: Carmine Fedele: Laura and Isaac Perlmutter Cancer Center, NYU Langone Health, New York, NY, 10016, USA

2 - Current address: Anindita Dutta: TATA Translational Cancer Research Centre, TATA Medical Center, Kolkata, India

**Correspondence to Lucia R. Languino**, 233 S. 10th Street, BLSB 506, Philadelphia, PA 19107, 215-503-3442, Fax: 215-923-9248, { [HYPERLINK "mailto:Lucia.Languino@jefferson.edu"](mailto:Lucia.Languino@jefferson.edu) }

**Keywords:**  $\alpha_v\beta_6$  Integrin, Prostate Cancer, M2 Polarization, STAT1, Monocytes, Exosomes
